# Supplementary material for: Simultaneous enhancements in the Seebeck coefficient and conductivity of PEDOT:PSS by blending ferroelectric BaTiO3 nanoparticles
Source: Royal Society of Chemistry journal article supplement (doi:10.1039/d1ta04235a), 2021-01-01
Supplement: d1ta04235a1.pdf [file d1ta04235a1.pdf]

## Supporting Information

### Simultaneous enhancements in the Seebeck coefficient and conductivity of PEDOT:PSS by blending with ferroelectric BaTiO<sub>3</sub> nanoparticles

Chang'an Li,<sup>‡ab</sup> Xin Guan,<sup>‡a</sup> Shizhong Yue,<sup>a</sup> Xizu Wang,<sup>c</sup> Jianmin Li,<sup>a</sup> Hanlin Cheng,<sup>a</sup> Shan Wang,<sup>a</sup> Aung Ko Ko Kyaw,<sup>\*b</sup> and Jianyong Ouyang<sup>\*a</sup>

<sup>a</sup> Department of Materials Science and Technology, National University of Singapore, Singapore 117576. Email: mseoj@nus.edu.sg

<sup>b</sup> Department of Electrical and Electronic Engineering at Southern University of Science and Technology, Shenzhen, Guangdong, China. Email: aung@sustech.edu.cn

<sup>c</sup> Institute of Materials Research and Engineering, (IMRE), Agency for Science, Technology and Research, (A\*STAR), 138634, Singapore

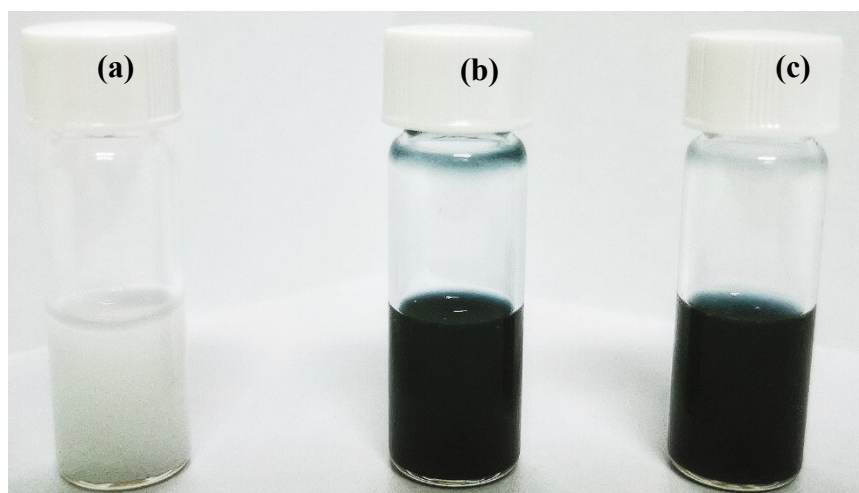

**Fig. S1.** Photos of aqueous dispersions of (a) BaTiO<sub>3</sub>, (b) PEDOT:PSS and (c) PEDOT:PSS with 20 vol% of BaTiO<sub>3</sub>.

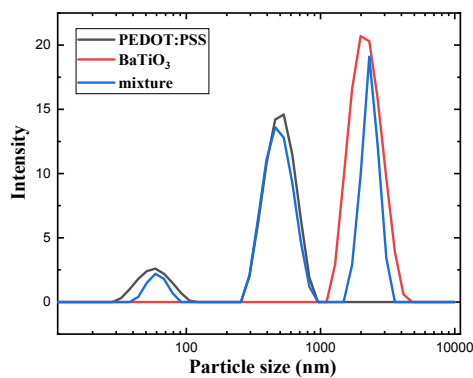

**Fig. S2.** Particle size distribution of PEDOT:PSS aqueous dispersion, BaTiO<sub>3</sub> aqueous suspension and their mixture suspension by dynamic light scattering (DLS) measurements.

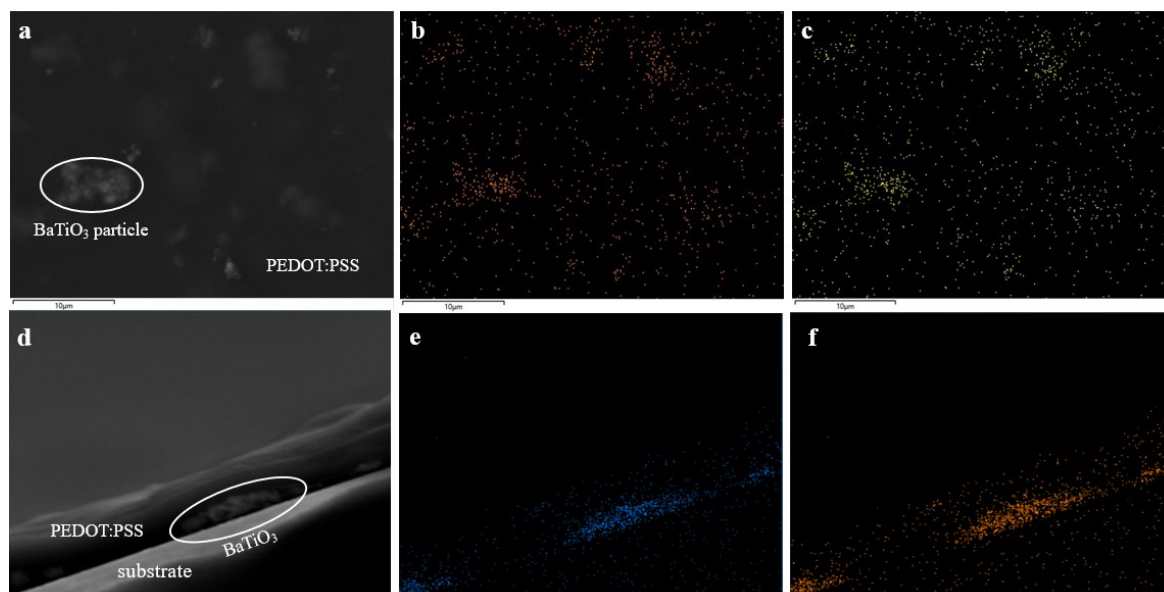

**Fig. S3.** (a) Surface and (d) cross-sectional SEM images of PEDOT:PSS/BaTiO<sub>3</sub> films with the BaTiO<sub>3</sub> loading of 50.0 vol.%. (b) and (c) are the corresponding surface EDS mappings of Ba and Ti. (e) and (f) are the corresponding cross-sectional EDS mappings of Ba and Ti EDS mappings.

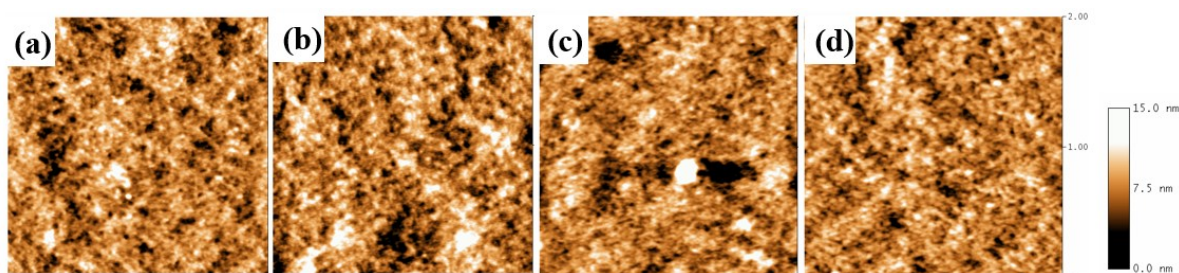

**Fig. S4.** Topographical AFM images of PEDOT:PSS/BaTiO<sub>3</sub> films with the BaTiO<sub>3</sub> loadings of (a) 0 vol%, (b) 20 vol%, (c) 33.3 vol%, and (d) 50 vol%. The dimension of each image is 2  $\mu\text{m} \times 2 \mu\text{m}$ .

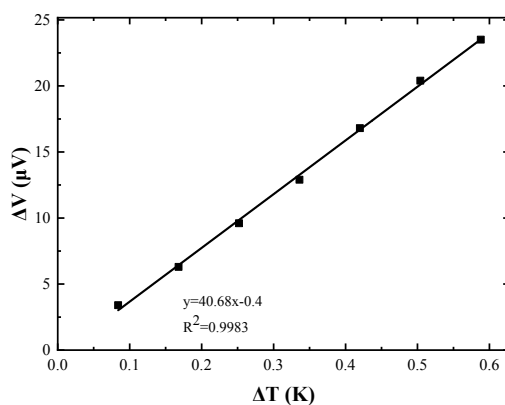

**Fig. S5.** The  $\Delta V$  vs  $\Delta T$  relationship of a PEDOT:PSS/ BaTiO<sub>3</sub> film with the BaTiO<sub>3</sub> loading of 45 vol%.

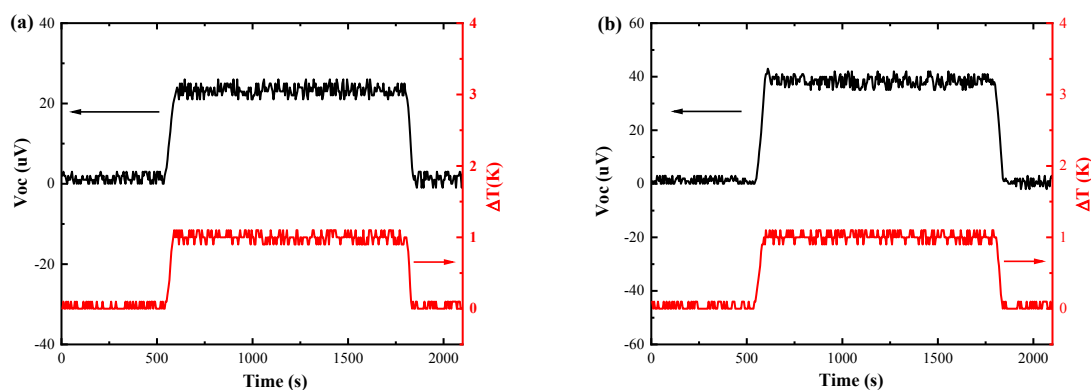

**Fig. S6.** A comparison of the open-circuit voltage ( $V_{oc}$ ) versus the time after a temperature gradient ( $\Delta T$ ) of 1 K was applied. (a) A neat PEDOT:PSS and (b) PEDOT:PSS/ BaTiO<sub>3</sub> film with 25 vol% BaTiO<sub>3</sub>.

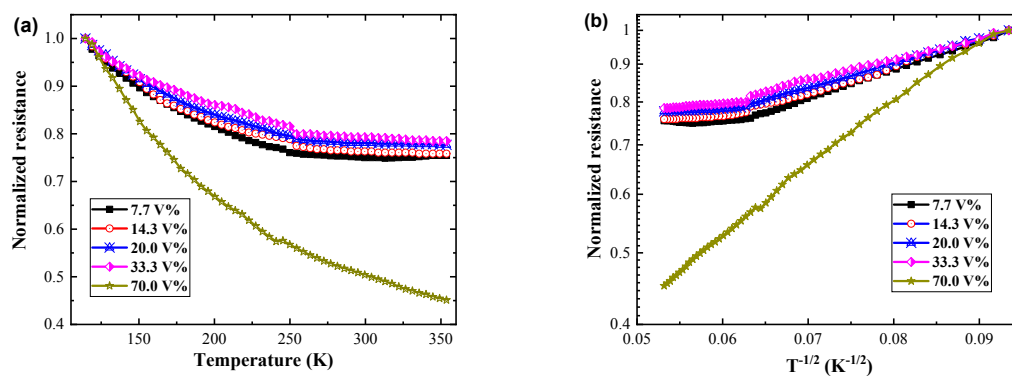

**Fig. S7.** (a) Temperature dependences of the resistances of a neat PEDOT:PSS film and PEDOT:PSS/BaTiO<sub>3</sub> composite films and (b) the analyses of the temperature dependences of the resistances with the one-dimensional VRH model. The BaTiO<sub>3</sub> loadings are indicated.
